# Supplementary material for: A Bioinformatics Investigation into the Pharmacological Mechanisms of Sodium-Glucose Co-transporter 2 Inhibitors in Diabetes Mellitus and Heart Failure Based on Network Pharmacology
Source: Cardiovasc Drugs Ther. 2021 May 24;36(4):713–26. doi: 10.1007/s10557-021-07186-y (PMC9270285; doi:10.1007/s10557-021-07186-y)
Supplement: Supplementary file 2 — The predicted targets of four SGLT2 inhibitors from DrugBank. (CSV 2 kb) [file 10557_2021_7186_MOESM2_ESM.csv]

SGLT2 inhibitors	Type	Name	Gene name	Uniprot ID
Dapagliflozin	target	Sodium/glucose cotransporter 2	SLC5A2	P31639
Dapagliflozin	transporter	P-glycoprotein 1	ABCB1	P08183
Dapagliflozin	enzyme	Cytochrome P450 1A1	CYP1A1	P04798
Dapagliflozin	enzyme	Cytochrome P450 1A2	CYP1A2	P05177
Dapagliflozin	enzyme	Cytochrome P450 2C9	CYP2C9	P11712
Dapagliflozin	enzyme	UDP-glucuronosyltransferase 2B7	UGT2B7	P16662
Dapagliflozin	enzyme	Cytochrome P450 2A6	CYP2A6	P11509
Dapagliflozin	enzyme	Cytochrome P450 2D6	CYP2D6	P10635
Dapagliflozin	enzyme	Cytochrome P450 3A4	CYP3A4	P08684
Dapagliflozin	enzyme	UDP-glucuronosyltransferase 1-9	UGT1A9	O60656
Dapagliflozin	enzyme	UDP-glucuronosyltransferase 2B4	UGT2B4	P06133
Canagliflozin	carrier	Alpha-1-acid glycoprotein 1	ORM1	P02763
Canagliflozin	enzyme	Cytochrome P450 3A4	CYP3A4	P08684
Canagliflozin	transporter	P-glycoprotein 1	ABCB2	P08184
Canagliflozin	enzyme	UDP-glucuronosyltransferase 1-9	UGT1A9	O60656
Canagliflozin	enzyme	UDP-glucuronosyltransferase 2B4	UGT2B5	P06133
Canagliflozin	target	Sodium/glucose cotransporter 2	SLC5A2	P31639
Canagliflozin	transporter	Canalicular multispecific organic anion transporter 1	ABCC2	Q92887
Canagliflozin	transporter	ATP-binding cassette sub-family G member 2	ABCG2	Q9UNQ0
Empagliflozin	enzyme	UDP-glucuronosyltransferase 2B7	UGT2B7	P16662
Empagliflozin	transporter	ATP-binding cassette sub-family G member 2	ABCG2	Q9UNQ0
Empagliflozin	transporter	Solute carrier organic anion transporter family member 1B3	SLCO1B3	Q9NPD5
Empagliflozin	target	Sodium/glucose cotransporter 2	SLC5A2	P31639
Empagliflozin	enzyme	UDP-glucuronosyltransferase 1-3	UGT1A3	P35503
Empagliflozin	enzyme	UDP-glucuronosyltransferase 1-8	UGT1A8	Q9HAW9
Empagliflozin	enzyme	UDP-glucuronosyltransferase 1-9	UGT1A9	O60656
Empagliflozin	transporter	P-glycoprotein 1	ABCB1	P08183
Empagliflozin	transporter	Solute carrier family 22 member 8	SLC22A8	Q8TCC7
Empagliflozin	transporter	Solute carrier organic anion transporter family member 1B1	SLCO1B1	Q9Y6L6
Ertugliflozin	transporter	ATP-binding cassette sub-family G member 2	ABCG2	Q9UNQ0
Ertugliflozin	enzyme	UDP-glucuronosyltransferase 2B7	UGT2B7	P16662
Ertugliflozin	transporter	P-glycoprotein 1	ABCB1	P08183
Ertugliflozin	enzyme	UDP-glucuronosyltransferase 1-9	UGT1A9	O60656
Ertugliflozin	target	Sodium/glucose cotransporter 2	SLC5A2	P31639
Ertugliflozin	carrier	Serum albumin	ALB	P02768
Ertugliflozin	enzyme	UDP-glucuronosyltransferase 1-1	UGT1A1	P22309
Ertugliflozin	enzyme	UDP-glucuronosyltransferase 1-4	UGT1A4	P22310
